# Supplementary material
Source: PubMed Central journal article supplement (PMC10465173)
Supplement: NIHMS1871751-supplement-1.pdf [file NIHMS1871751-supplement-1.pdf]

**SUPPLEMENTAL MATERIAL**

| <b>Supplemental Table 1.</b> Distributions of number of zero-emissions vehicles (nZEV) per 1,000 population and age-adjusted asthma-related emergency department (ED) visit rates by year among zip codes included in the asthma ED visit rate and nitrogen dioxide (NO <sub>2</sub> ) analysis. Mean (standard deviation) presented. |                                                        |                                                    |                             |
|---------------------------------------------------------------------------------------------------------------------------------------------------------------------------------------------------------------------------------------------------------------------------------------------------------------------------------------|--------------------------------------------------------|----------------------------------------------------|-----------------------------|
| <b>Characteristic/Year</b>                                                                                                                                                                                                                                                                                                            | <b>Zip codes in asthma ED visit analysis (n=1,238)</b> | <b>Zip codes in NO<sub>2</sub> analysis (n=95)</b> | <b>P-value <sup>a</sup></b> |
| <i>nZEV per 1,000 population</i>                                                                                                                                                                                                                                                                                                      |                                                        |                                                    |                             |
| 2013                                                                                                                                                                                                                                                                                                                                  | 1.4 (2.0)                                              | 0.9 (1.2)                                          | <0.001                      |
| 2014                                                                                                                                                                                                                                                                                                                                  | 2.9 (3.6)                                              | 1.9 (2.5)                                          | <0.001                      |
| 2015                                                                                                                                                                                                                                                                                                                                  | 4.4 (5.4)                                              | 2.8 (3.7)                                          | <0.001                      |
| 2016                                                                                                                                                                                                                                                                                                                                  | 6.1 (7.1)                                              | 4.2 (5.1)                                          | <0.001                      |
| 2017                                                                                                                                                                                                                                                                                                                                  | 8.7 (9.5)                                              | 6.0 (6.6)                                          | <0.001                      |
| 2018                                                                                                                                                                                                                                                                                                                                  | 12.1 (12.9)                                            | 8.2 (8.5)                                          | <0.001                      |
| 2019                                                                                                                                                                                                                                                                                                                                  | 14.7 (14.7)                                            | 10.4 (10.0)                                        | <0.001                      |
| <i>Age-adjusted asthma ED visit rate per 10,000 population</i>                                                                                                                                                                                                                                                                        |                                                        |                                                    |                             |
| 2013                                                                                                                                                                                                                                                                                                                                  | 49.5 (30.5)                                            | 61.6 (36.4)                                        | 0.001                       |
| 2014                                                                                                                                                                                                                                                                                                                                  | 49.7 (30.6)                                            | 61.5 (36.6)                                        | 0.001                       |
| 2015                                                                                                                                                                                                                                                                                                                                  | 51.4 (31.9)                                            | 63.7 (39.6)                                        | 0.002                       |
| 2016                                                                                                                                                                                                                                                                                                                                  | 46.3 (29.6)                                            | 56.9 (35.4)                                        | 0.003                       |
| 2017                                                                                                                                                                                                                                                                                                                                  | 48.6 (34.8)                                            | 57.7 (36.1)                                        | 0.013                       |
| 2018                                                                                                                                                                                                                                                                                                                                  | 43.3 (28.0)                                            | 51.9 (30.8)                                        | 0.005                       |
| 2019                                                                                                                                                                                                                                                                                                                                  | 43.0 (27.5)                                            | 51.6 (31.0)                                        | 0.006                       |

<sup>a</sup> P-value from t-tests comparing differences in characteristics between zip codes with and without NO<sub>2</sub> monitor data.

**Supplemental Table 2.** Adjusted change in annual average nitrogen dioxide (NO<sub>2</sub>) concentration (ppb) associated with a within-zip code increase of 20 zero-emissions vehicles (ZEVs) per 1,000 population, from primary model and various sensitivity analyses.

| <b>Model</b>                                                                                    | <b>Estimate</b> | <b>95% CI</b>  | <b>p-value</b> | <b>N obs</b> |
|-------------------------------------------------------------------------------------------------|-----------------|----------------|----------------|--------------|
| Primary model <sup>a</sup>                                                                      | -0.41           | (-1.12, 0.29)  | 0.252          | 629          |
| Fixed effect for monitoring site; no random effects                                             | -0.84           | (-1.41, -0.28) | 0.003          | 629          |
| Adjustment for % poverty instead of % bachelor's degree                                         | -0.71           | (-1.34, -0.09) | 0.025          | 629          |
| Adjustment for median household income instead of % bachelor's degree                           | -0.62           | (-1.28, 0.04)  | 0.064          | 629          |
| Adjustment for % high school degree instead of % bachelor's degree                              | -0.54           | (-1.19, 0.12)  | 0.110          | 629          |
| No random slope on year                                                                         | -0.78           | (-1.34, -0.22) | 0.007          | 629          |
| No adjustment for % bachelor's degree                                                           | -0.92           | (-1.51, -0.33) | 0.002          | 629          |
| No adjustments for year                                                                         | -3.28           | (-3.72, -2.85) | <0.001         | 629          |
| No adjustments for year or % bachelor's degree                                                  | -3.31           | (-3.74, -2.87) | <0.001         | 629          |
| Include only annual averages based on > 75% complete data                                       | -0.27           | (-1.03, 0.48)  | 0.480          | 599          |
| Include additional years of data: 2013-2021                                                     | -0.98           | (-1.51, -0.45) | <0.001         | 804          |
| Include additional year of data: 2013-2019 and 2021 (exclude 2020)                              | -0.91           | (-1.46, -0.36) | 0.001          | 716          |
| Include additional years of data and only > 75% complete data: 2013-2021                        | -0.70           | (-1.28, -0.12) | 0.019          | 768          |
| Include additional year of data and only > 75% complete data: 2013-2019 and 2021 (exclude 2020) | -0.64           | (-1.25, -0.02) | 0.041          | 681          |

<sup>a</sup> Primary model estimated using a linear mixed effects model adjusted for % bachelor's degree, calendar year (linear and quadratic effect, centered at 2013), with random intercepts for zip code and site within zip code, and a zip code-level random slope on the linear effect of year.

**Supplemental Table 3.** Adjusted percent difference in age-adjusted asthma-related emergency department (ED) visits associated with a within-zip code increase of 20 zero-emissions vehicles (ZEVs) per 1,000 population, from primary model and various sensitivity analyses.

| <b>Model</b>                                                          | <b>Estimate</b> | <b>95% CI</b>  | <b>p-value</b> |
|-----------------------------------------------------------------------|-----------------|----------------|----------------|
| Primary model <sup>a</sup>                                            | -3.2            | (-5.4, -0.9)   | 0.006          |
| Fixed effect for zip code; no random effects                          | -2.0            | (-3.8, -0.2)   | 0.029          |
| Adjustment for % poverty instead of % bachelor's degree               | -8.2            | (-10.2, -6.1)  | 0.000          |
| Adjustment for median household income instead of % bachelor's degree | -3.0            | (-5.2, -0.7)   | 0.010          |
| Adjustment for % high school degree instead of % bachelor's degree    | -7.8            | (-9.9, -5.7)   | 0.000          |
| No random slopes on year terms                                        | -2.8            | (-4.6, -1.1)   | 0.002          |
| Additional random slope on nZEV                                       | -2.9            | (-5.5, -0.2)   | 0.033          |
| No adjustment for % bachelor's degree                                 | -13.0           | (-14.9, -11.1) | 0.000          |
| No adjustments for year                                               | -14.0           | (-15.1, -12.8) | 0.000          |
| No adjustments for year or % bachelor's degree                        | -15.9           | (-17, -14.8)   | 0.000          |
| Include only data from 2016-2019 (only ICD-10 codes)                  | -6.9            | (-9.8, -3.8)   | 0.000          |

<sup>a</sup> Primary model estimated using a linear mixed effects model adjusted for % bachelor's degree, calendar year (linear and quadratic effect, centered at 2013), with random intercepts for zip code, and a zip code-level random slope on the linear and quadratic effects of year.

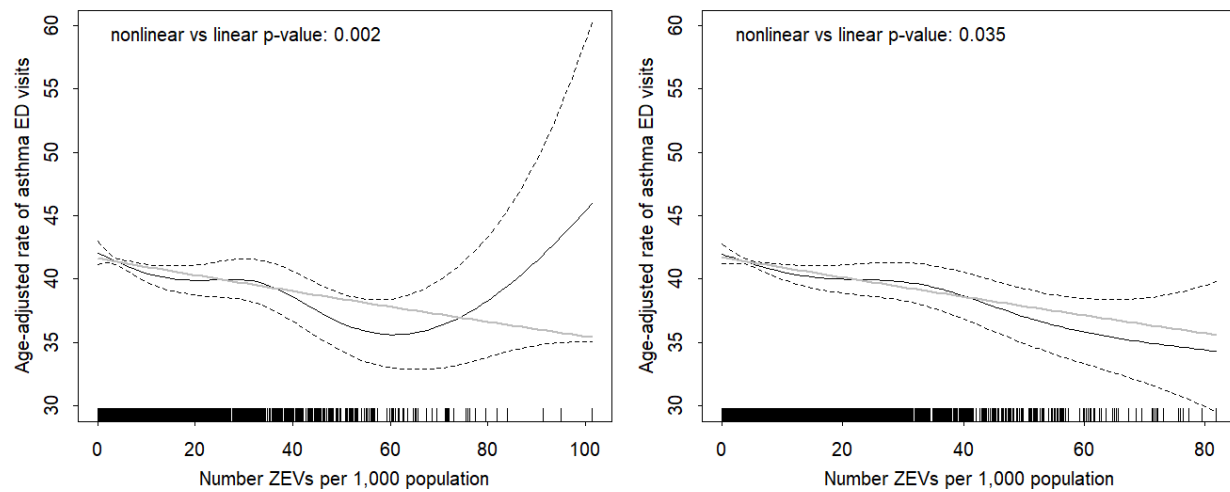

**Supplemental Figure 1.** Adjusted association between number of zero-emissions vehicles (nZEVs) per 1,000 population and age-adjusted rate of asthma emergency department (ED) visits per 10,000 population with (left) all data and (right) excluding 4 observations with nZEV >82. Gray lines indicate the estimated association from an analogous linear mixed model. Predictions plotted are for a typical zip code, average educational attainment, year held constant at 2016. From the nonlinear model using all data, the estimated change in the age-adjusted rate of asthma ED visits associated with a within-zip code increase of 20 ZEV per 1,000 population was: -5.1% (95% CI: -5.1, -0.4) for an increase from 0 to 20 ZEVs per 1,000 and -8.6% (95% CI: -12.6, -4.4) for an increase from 30 to 50 ZEVs per 1,000.
